# Supplementary material for: Demand Prediction of Emergency Supplies under Fuzzy and Missing Partial Data
Source: Hindawi journal article supplement (doi:10.1155/2019/6823921), 2019-05-09
Supplement: f1 [file 6823921.f1.docx]

Table 1 data sets of earthquake disaster losses in mainland China during the period of 2006–2010

| **Number of households** | **Population** | **Earthquake magnitude** | **Focal depth**  **/km** | **Epicentral intensity** | **Area of the disaster-stricken area/km²** | **Death toll** | **Number of injuries** | **Number of people losing houses** |
| --- | --- | --- | --- | --- | --- | --- | --- | --- |
| 5061 | 29951 | 5 | 23 | 5 | 143 | 19 | 0 | 881 |
| 2994 | 5599 | 5 | 25 | 6 | 702 | 0 | 0 | 548 |
| 1666 | 4476 | 6.1 | 25 | 8 | 8138 | 0 | 0 | 602 |
| 1863 | 9250 | 6.2 | 30 | 5 | 38 | 0 | 0 | 1351 |
| 4363 | 10842 | 4.4 | 22 | 5 | 132 | 0 | 0 | 2147 |
| 9824 | 13552 | 5 | 13 | 6 | 5845 | 0 | 305 | 29 |
| 3282 | 11961 | 5.5 | 25 | 6 | 7729 | 0 | 158 | 2337 |
| 2024 | 3949 | 4.2 | 16 | 6 | 936 | 0 | 0 | 253 |
| 17253 | 18376 | 4.6 | 20 | 6 | 66 | 0 | 0 | 577 |
| 4953 | 5089 | 5.1 | 15 | 6 | 22 | 0 | 0 | 198 |
| 4782 | 8541 | 5.1 | 11 | 6 | 8150 | 0 | 0 | 2371 |
| 8280 | 10700 | 4.8 | 24 | 7 | 93 | 13 | 340 | 849 |
| 1052 | 1103 | 5.1 | 14 | 6 | 628 | 0 | 0 | 157 |
| 5659 | 9091 | 5.4 | 27 | 6 | 320 | 33 | 10 | 1373 |
| 5772 | 7281 | 6.3 | 12 | 6 | 23 | 0 | 0 | 53 |
| 6398 | 10119 | 5 | 14 | 6 | 1719 | 0 | 3297 | 113 |
| 8733 | 15860 | 5 | 12 | 6 | 217 | 0 | 0 | 937 |
| 4560 | 14761 | 6.4 | 10 | 7 | 3307 | 0 | 0 | 35 |
| 3975 | 17465 | 5.1 | 10 |  | 1464 | 0 | 0 | 8761 |
| 1945 | 13236 | 6.7 | 26 | 8 | 368 | 0 | 0 | 8971 |
| 7238 | 17186 | 4.7 | 23 | 7 | 9725 | 0 | 0 | 14417 |
| 4902 | 13490 | 4.2 | 29 | 6 | 5718 | 13 | 0 | 937 |
| 7420 | 7520 | 5 | 17 | 6 | 15833 | 0 | 0 | 41 |
| 6486 | 7414 | 5 | 10 | 5 | 211 | 0 | 0 | 2911 |
| 9103 | 10220 | 6.3 | 25 | 8 |  | 0 | 1 | 10 |
| 5890 | 12201 | 5.1 | 11 | 6 | 19754 | 0 | 21 | 16 |
| 1153 | 13561 | 5 | 20 | 6 | 2160 | 4 | 0 | 211 |
| 8603 | 10313 | 5 | 6 | 6 | 2461 | 0 | 0 | 10306 |
| 3461 | 16805 | 5 | 30 | 8 | 24030 | 0 | 0 | 2579 |
| 3327 | 8381 | 4.4 | 12 | 5 | 31 | 0 | 0 | 4757 |
| 6535 | 24558 | 6.6 | 7 | 5 | 437 | 0 | 0 | 36 |
| 1887 | 3767 | 4.8 |  | 6 | 4019 | 0 | 0 | 3026 |
| 2233 | 10714 | 5 | 26 | 6 | 24624 | 0 | 0 | 586 |
| 3106 | 13632 | 4.5 | 20 | 7 | 378 | 0 | 0 | 115 |
| 3186 | 14726 | 5.1 | 20 | 6 | 8350 | 0 | 0 |  |
| 2848 | 8372 | 6.4 | 19 | 7 | 1416 | 41 | 0 | 191 |
| 1055 | 3480 | 4.2 | 23 | 7 | 2333 | 7 | 0 | 1124 |
| 13696 | 16892 | 4.4 | 25 | 7 | 1003 | 0 | 326 | 4587 |
| 7845 | 15311 | 5 | 18 | 6 | 337 | 1 | 0 | 13 |
| 5724 | 13976 | 4.8 | 9 | 6 | 2422 | 0 | 0 | 273 |
| 9829 | 19359 | 5.1 | 28 | 7 | 636 | 0 | 0 | 8 |
| 401 | 527 | 4.6 | 15 | 5 | 286 | 0 | 0 | 9 |
| 9017 | 12439 | 5.1 | 7 | 6 | 3759 | 0 | 13 | 12255 |
| 9159 | 10854 | 6.5 | 30 | 6 | 49 | 0 | 309 | 73 |
| 1607 | 2655 | 7 | 6 | 8 | 6094 | 0 | 0 | 712 |
| 8089 | 13390 | 5.1 | 17 | 6 | 245 | 0 | 0 | 1386 |
| 4904 | 12874 | 5.5 | 6 | 6 | 59 | 0 | 1 | 9772 |
| 9879 | 19822 | 5.1 | 5 | 6 | 30197 | 0 | 0 | 4013 |
| 4536 | 19802 | 4.5 | 20 | 6 | 1069 | 0 | 0 | 16496 |
| 1366 | 12715 | 5 | 17 | 9 | 1419 | 0 | 0 | 467 |
| 9257 | 14064 | 6.5 | 9 | 5 | 11540 | 0 | 0 | 4720 |
|  | 14458 | 4.2 | 20 | 7 | 2298 | 0 | 1194 | 1186 |
| 5762 | 15004 | 5 | 28 | 7 | 27 | 0 | 0 | 585 |
| 194709 | 615164 | 4.6 | 5 | 7 | 8373 | 0 | 0 | 16908 |
| 7096 | 18544 | 5.1 | 27 | 6 | 2426 | 0 | 0 | 3648 |
| 4851 | 18458 | 5 | 8 | 8 | 32 | 0 | 0 | 4508 |
| 1377 | 9555 | 5 | 9 | 6 | 706 | 0 | 9 | 10 |
| 4324 | 6918 | 5.1 | 25 | 6 | 34775 | 0 | 0 | 602 |
| 2288 | 6784 | 5 | 20 | 6 | 4428 | 7 | 0 | 109 |
| 995 | 5512 |  | 11 | 7 | 748 | 2 | 0 | 2797 |
| 208261 | 442032 | 4.3 | 23 | 6 | 10895 | 0 | 22 | 82628 |
| 2720 | 17805 | 5.1 | 16 | 6 | 10279 | 0 | 0 | 1096 |
| 7094 | 17207 | 5.4 | 21 | 5 |  | 0 | 0 | 7101 |
| 6127 | 10026 | 5.1 | 15 | 6 | 24 | 0 | 0 | 7 |
| 2920 | 11183 | 4.7 | 27 | 6 | 5191 | 0 | 0 | 12 |
| 8122 | 11594 | 5.9 | 30 | 6 | 479 | 0 | 0 | 199 |
| 2110 | 14490 | 5.1 | 18 | 7 | 140 | 0 | 6 | 12 |
| 9049 | 10077 | 4.8 | 28 | 6 | 46 | 0 | 0 | 1095 |
| 8723 | 17997 | 5 | 7 | 6 | 9742 | 0 | 237 | 89 |
| 6759 | 13828 | 5.1 | 10 | 7 | 9856 | 0 | 0 | 41 |
| 3160 | 8642 | 5.1 | 19 | 5 | 2862 | 0 | 0 | 332 |
| 1762 | 16743 | 5 | 14 | 6 | 806 | 0 | 0 | 5992 |
| 5517 | 18100 | 5 | 24 | 6 | 29 | 1 | 0 | 15650 |
| 1162 | 7286 | 4.3 | 19 | 7 | 1240 | 0 | 0 | 697 |
| 9772 | 16770 | 5.5 | 25 | 6 | 3580 | 0 | 0 | 76 |
| 3609 | 12309 | 6 | 17 | 5 | 93 | 0 | 193 | 4304 |
| 1971 | 16296 | 4.8 | 25 | 7 | 8791 | 7 | 592 | 82 |
| 7817 | 17914 | 6.7 | 7 | 6 | 23045 | 0 | 0 | 16893 |
| 918 | 2343 | 5 | 23 | 6 | 155 | 0 | 0 | 9 |
| 195352 | 200292 | 5.5 | 8 | 6 | 4921 | 0 | 0 | 15025 |
| 6013 | 19308 | 4.1 | 14 | 7 | 22725 | 0 | 10 | 15866 |
| 1590 | 9425 | 4.5 | 23 | 6 | 35692 | 0 | 0 | 33 |
| 7651 | 14313 | 4.9 | 28 | 6 | 1977 | 2 | 0 | 17 |
| 3160 | 13680 | 5.1 | 29 | 7 | 98 | 0 | 0 | 6768 |
| 2997 | 11234 | 4.5 | 18 | 6 | 24 | 0 | 0 | 6092 |
| 5356 | 19513 | 5 | 26 | 6 | 33684 | 0 | 0 | 750 |
| 9614 | 10840 | 6.4 | 5 | 6 | 456 | 0 | 0 | 696 |
| 6044 | 14527 | 5 | 19 | 6 | 782 | 0 | 0 | 8770 |
| 3641 | 7615 | 5 | 26 | 6 | 540 | 0 | 0 | 811 |
| 5397 | 33281 | 5.1 | 30 | 6 | 6592 | 0 | 0 | 19457 |
| 2908 | 6217 | 5.6 | 6 | 9 | 22 | 0 | 500 | 83 |
| 3681 | 6926 | 5.1 | 21 | 6 | 865 | 0 | 0 | 5845 |
| 2050 | 13840 | 5.1 | 29 | 6 | 2697 | 0 | 0 | 5127 |
| 3595 | 10362 | 5 | 23 | 6 | 52 | 0 | 611 | 19 |
| 1680 | 8047 | 4.8 | 6 | 6 | 275 | 0 | 0 | 2336 |
| 13581 | 17754 | 5 | 5 | 6 | 35895 | 0 | 0 | 83 |
| 5498 | 8445 | 5.9 | 16 | 7 | 693 | 3 | 0 | 121 |
| 6723 | 18877 | 5 | 19 | 7 | 1145 | 0 | 0 | 192 |
| 2203 | 15255 | 5 | 12 | 6 | 100 | 39 | 103 | 13108 |
| 3752 | 14523 | 5 | 15 | 6 | 68 | 0 | 0 | 10 |
| 1624 | 4117 | 5.1 | 18 | 7 | 18535 | 0 | 170 | 2815 |
| 2845 | 3237 | 4.1 | 18 | 6 |  | 0 | 0 | 114 |
| 3044 | 12616 | 4.4 | 6 | 6 | 1905 | 0 | 0 | 107 |
| 4556 | 6458 | 5 | 27 | 6 | 32436 | 0 | 151 | 13 |
| 5833 | 14277 | 5.1 | 25 | 6 | 511 | 0 | 233 | 17 |
| 11499 | 18042 | 6.9 | 15 | 6 | 1878 | 0 | 0 | 3921 |
| 2672 | 8048 | 5.2 | 9 | 6 | 32 | 1 | 0 | 797 |
| 57818 | 90375 | 4.1 |  | 6 | 17919 | 0 | 0 | 47 |
| 9908 | 19558 | 6.3 | 20 | 6 | 98 | 0 | 0 | 32 |
| 11911 | 16166 | 5.1 | 22 | 7 | 77 | 0 | 0 | 12 |
| 1724 | 3502 | 4.1 | 26 | 6 | 73 | 0 | 0 | 10 |
| 13644 | 247027 | 5.1 | 22 | 7 | 1702 | 0 | 29 | 5521 |
| 14062 | 60273 | 5 | 16 | 6 | 725 | 0 | 1 | 7900 |
|  | [83000,86500] | 5 | 15 | 6 | 1565 | 0 | 2 | 1045 |
| 14814 | 69054 | 5 | 15 | 6 | 737 | 1 | 19 | 6643 |
| [7830,8023] | [29315,31442] | 5.1 | 20 | 5 | 58 | 0 | 0 | 0 |
| 14062 | 60273 | 5 | 16 | 6 | 725 | 0 | 0 | 1145 |
| 35428 | 151168 | 5.1 | 9 | 6 | 890 | 22 | 114 | 20606 |
| 61170 | 262538 | 5.1 | 7 | 7 | 1350 | 2 | 67 | 18509 |
| 351 | 423 | 5.1 | 17 | 5 | 200 | 0 | 0 | 0 |
|  | [246598,248931] | 4.9 | 6 | 6 | 578 | 0 | 0 | 0 |
| 94286 | 403128 | 6.4 | 5 | 8 | 167 | 3 | 419 | 61780 |
| 30311 | 115845 | 5.7 | 25 | 7 | 4224.2 | 0 | 0 | 19383 |
| 21023 | 74419 | 4.6 | 6 | 6 | 150 | 0 | 1 | 370 |
| 46562 | 61880 | 7.3 | 33 | 7 | 12940 | 0 | 0 | 12081 |
| 14319 | 66824 | 5 | 11 | 6 | 423 | 0 | 0 | 11060 |
| 1650 | 6500 | 4.1 | 10 | 6 | 35 | 0 | 0 | 0 |
|  |  | 5 | 33 | 6 |  | 0 | 0 | 1061 |
| 8861 | 29669 | 5.1 | 22 | 6 | 480 | 0 | 0 | 7393 |
|  | 42131 | 5.2 | 14 | 6 | [9948,11024] | 0 | 0 | 0 |
| 81299 | 355395 | 5.9 | 7 | 7 | 4511 | 5 | 130 | 99480 |
| 365189 | 1261823 | 6.1 | 10 | 8 | 9634 | 35 | 638 | 121756 |
| 2587 | 10358 | 5.3 | 25 | 6 | 3640 | 0 | 0 | 880 |
| 7595 | 30380 | 6.8 | 27 | 8 | 8385 | 0 | 0 | 1304 |
| 23899 | 121406 | 6.6 | 8 | 6 | 23561 | 10 | 60 | 20000 |
|  | 72228 | 6.3 | 10 | 6 | 33525 | 0 | 3 | 7946 |
| [2387,2839] | [7339,8207] | 4.1 | 8 | 6 | 40 | 0 | 1 | 70 |
| 32076 | 109426 | 4.9 | 5 | 6 | 274 | 0 | 22 | 9376 |
| 3774 | 13851 | 5.1 | 7 | 6 | 961 | 0 | 0 | 5123 |
| 13283 | 54790 | 5.2 | 6 | 6 | 3600 | 0 | 0 | 7029 |
| 7588 | 34204 | 5.5 | 7 | 6 | 4050 | 0 | 0 | 3194 |
| 2845 | 13798 | 5 | 7 | 6 | 2210 | 0 | 0 | 2828 |
| 201739 | 803206 | 6 | 10 | 8 | 6958 | 1 | 372 | 149990 |
|  | [246000,353000] | 4 | 11 | 6 | 817 | 2 | 1 | 436 |
|  | [12000,18000] | 6.4 | 8 | 7 | 35230 | 0 | 0 | 0 |
| 33577 | 110736 | 5 | 10 | 6 | 945 | 0 | 31 | 17677 |
| [154605,164710] | [500000,600000] | 5 | 10 | 7 | 1008 | 1 | 16 | 4000 |
|  | [352736,384568] | 5 | 10 | 7 | 475 | 0 | 0 | 4859 |
| 462 | 1700 | 4.2 | 10 | 6 | 212 | 0 | 0 | 48 |
| 40704 | 164521 | 5.1 | 16 | 6 | 1563 | 0 | 35 | 31687 |
|  |  | 4.5 | 8 | 5 | 208 | 0 | 1 | 0 |
|  | [210295,256825] | 7.1 | 14 | 9 | 35862 | 2220 | 13580 | 26879 |
| 974 | 3094 | 4.6 | 5 | 5.5 | 377.6 | 0 | 0 | 0 |
| 3240 | 10364 | 5.1 | 8 | 6 | 1663 | 0 | 0 | 0 |
|  | [2805478,3047750] | 4.7 | 8 | 6 | 426 | 0 | 12 | 0 |
| 10833 | 51964 | 6 |  |  | 11050 | 10 | 154 | 15650 |
| 10916 | 45449 | 5 | 10 | 6 | 441 | 0 | 6 | 2064 |
| 2988 | 12000 | 5 |  | 5 | 3306 | 0 | 0 | 168 |
| 165494 | 669648 | 5.9 | 10 | 7.5 | 3414 | 3 | 235 | 59190 |
| 8532 | 44149 | 5.8 | 5 | 7.5 | 2180 | 1 | 39 | 5930 |
| 10772 | 49822 | 5.8 | 5 | 6.5 | 500 | 0 | 32 | 1040 |
| 25959 | 106128 | 5.3 | 5 | 7.5 | 510 | 1 | 15 | 3944 |
| 23901 | 83651 | 4.9 | 15.4 | 6.5 |  | 0 | 33 |  |
| 17009 | 68145 | 5.3 | 13 | 6 | 543 | 0 | 1 | 116 |
| 56 | 499 | 5.3 | 10 | 5.5 | 280 | 0 | 0 | 0 |
| 18070 | 61750 | 5.1 | 8 | 6 | 183 | 0 | 4 | 400 |
| 91455 | 344916 | 6 | 15 | 6.5 | 2492 | 1 | 220 | 19074 |
| 1138 | 5692 | 4.7 | 5 |  | 900 | 0 | 0 | 1665 |
| 8261 | 39987 | 5 | 6 |  |  | 0 | 5 | 2167 |
|  | 173000 | 6.3 | 32 |  |  | 0 | 0 |  |
|  | 18000 | 5.8 | 11 | 5.5 | 46143 |  |  |  |
| 17770 | 62195 | 5.1 | 15 | 6 | 700 | 1 | 11 | 2034 |
| 27301 | 110097 | 5.3 | 10 |  | 850 | 0 | 25 | 12592 |
| 27137 |  | 5.3 | 15 |  |  | 0 | 29 |  |
| 946 | 3413 | 5.2 |  | 6 | 1502.7 | 0 | 0 | 1239 |
|  |  | 4.6 | 16 |  |  | 1 | 3 | 636 |
| 120000 | 500000 | 5.7 | 10 | 6.5 | 1800 | 13 | 613 |  |
| 2860 |  | 5.6 | 15 | 6 |  | 0 | 5 | 2860 |
|  | 53000 | 5.9 | 30 | 7 | 1870 | 1 | 5 | 4882 |
| 12441 | 55639 | 5.9 | 54 |  |  |  |  |  |
| 16000 | 48320 | 4.7 | 5 | 6 | 100 | 0 | 10 |  |
|  | 18000 | 6.7 | 16 |  | 46143 | 0 | 0 |  |
| 5525 | 30524 | 5.3 | 16 | 7 | 4000 | 0 | 9 | 1722 |
| 75158 | 313556 | 5.6 | 10 | 8 |  | 4 | 597 | 63336 |
|  | 29000 | 5.8 |  |  | 26017 |  |  |  |
| 3839 | 12999 | 4 |  | 6 | 70 | 0 | 1 | 7900 |
| 9095 | 40838 | 5 | 33 | 7 | 386 | 1 | 36 | 9085 |
| 21195 |  | 4.9 | 12 | 6 |  |  |  |  |
| 126364 | 398327 | 5 | 6 | 6 | 443 | 0 | 15 | 5053 |
|  | 27000 | 5 | 15 | 6 | 725 | 0 |  |  |
| 17175 | 65500 | 5.9 | 15 | 7 | 8910 | 2 | 350 |  |
| 8286 | 33889 |  | 20 | 6 |  | 0 | 1 | 2724 |
| 9343 | 35715 | 5 | 7 |  |  | 1 | 20 |  |
| 18176 | 81339 | 4.7 | 8 | 6 | 918 | 1 | 30 | 4191 |
| 2442 | 11790 | 5.2 | 20 | 6 | 25 | 0 | 0 | 0 |
|  |  | 4.7 | 10.7 | 6 | 6870 | 0 | 7 | 44000 |
| 4347 | 12769 | 5.6 | 11 | 7 | 110 |  |  |  |
| 54506 | 178947 | 6.2 | 10 | 8 | 510 | 49 | 11439 | 44000 |
| 3771 | 15000 | 5.2 | 2 | 6 | 10400 | 0 | 0 | 0 |
| 4456 | 25076 | 4.9 | 25 | 6.5 | 466 | 0 | 2 | 0 |
| 3400 |  | 5 | 15.5 | 6 | 2780 | 0 | 1 | 0 |
| 1826 | 10851 | 5 | 30 | 7.2 | 1805.2 | 0 | 0 | 0 |
| 3236 | 24058 | 6.1 | 14 | 7 | 670 | 0 | 0 | 0 |
| 2610 | 16500 | 4.6 | 15 | 6 | 4560 | 0 | 34 | 4350 |
| 2544 | 12720 | 6 | 11 | 7 | 1885 | 0 | 0 | 2310 |
| 8015 | 28264 | 6.2 | 11 | 5 | 3050 | 49 | 11439 | 44000 |
| 11232 | 46473 | 5.5 | 11 | 6 | 1838 | 0 | 15 | 2423 |
| 24739 | 120534 | 6.6 | 11 | 8 | 2864 | 3 | 13 | 42780 |
| 28289 | 137714 | 6 | 11 | 7 | 1917 | 0 | 3 | 16610 |
| 17154 | 68614 | 5.6 | 11 | 6 | 4052.2 | 0 | 3 | 6357 |
|  | 54628 | 6.2 | 11 | 7 | 2860.99 | 0 | 26 | 5566 |
| 30105 | 127870 | 5.6 | 10 | 8 | 3182 | 5 | 1487 | 25706 |
| 14949 | 59337 | 5.3 | 13 | 7 | 711 | 0 | 32 | 7738 |
| 97883 | 453641 | 5.1 | 10 | 7 | 1408.5 | 0 | 84 | 6996 |
|  | 42121 | 5 | 12 | 7 | 28.1 | 0 | 11 | 0 |
|  | 7727 | 5.1 | 20 | 6 | 546.6 | 0 | 0 | 0 |
| 1090 | 3870 | 5.6 |  | 6 |  | 0 | 0 |  |
| 25542 | 88085 | 5.6 | 9 | 7 | 205 | 0 | 73 | 15726 |
| 20000 | 80000 | 5.6 | 15 | 7 | 740 | 0 | 0 | 5734 |
| 21522 | 64029 | 5 | 26 | 6 |  | 1 | 2 |  |
| 951 |  | 5.1 | 1 | 7 |  | 0 | 15 |  |
| 1737 | 5500 | 5 | 9 | 6 | 60 | 0 | 4 | 0 |
| 4774 | 24833 | 5 | 13 | 6 | 1648 | 0 | 0 |  |
| 241639 | 963904 | 5.9 | 30 | 8 | 7834 | 7 | 2528 | 96202 |
|  | 12000 | 5.7 | 11 | 6 |  | 0 | 0 | 160 |
| 59265 | 260165 | 5.5 | 10 | 7 | 2260 | 0 | 69 | 4291 |
| 2360 | 13610 | 5.3 | 13 | 7 | 942 | 0 | 0 |  |
|  | 190000 | 4.7 | 16 | 6 | 140 | 1 | 28 |  |
| 2363 | 10531 | 5.9 | 15 | 8 | 434 | 0 | 24 | 34251 |
| 17375 | 73415 | 5.1 | 8 | 6 | 783 | 2 | 220 | 3476 |
| 20706 | 88400 | 5.8 | 18 | 6 | 600 | 0 | 15 | 1495 |

Table 2 Performance comparison of GABP model before and after the improvement

| i-th Prediction | GABP | improved GABP | i-th Prediction | GABP | improved GABP |
| --- | --- | --- | --- | --- | --- |
| 1 | -0.99858 | -0.99978 | 26 | -0.99593 | -0.99986 |
| 2 | -0.99631 | -1.18224 | 27 | -0.96698 | -10.7128 |
| 3 | 1.686374 | -0.99941 | 28 | -0.9898 | -1.00003 |
| 4 | 1.834398 | -10.6854 | 29 | 8.908255 | -0.259 |
| 5 | -0.99828 | -0.9954 | 30 | 11.02171 | 8.978004 |
| 6 | -0.99099 | -0.99007 | 31 | -1.00043 | 10.42481 |
| 7 | -0.46156 | 11.55273 | 32 | -1.00054 | -16.1195 |
| 8 | -0.99527 | -15.9964 | 33 | -0.99972 | 4.650659 |
| 9 | 0.811761 | -0.99942 | 34 | 9.661287 | 13.67684 |
| 10 | 0.999984 | 9.420475 | 35 | -0.99746 | -12.9131 |
| 11 | -10.7073 | 12.3244 | 36 | -1.00002 | 10.85785 |
| 12 | -0.99845 | -1.00078 | 37 | -0.99831 | -10.8512 |
| 13 | -0.99986 | -14.6926 | 38 | 9.346593 | 14.38297 |
| 14 | -0.9995 | -10.7901 | 39 | -0.9986 | -0.86273 |
| 15 | 7.988834 | -0.99941 | 40 | -1.00034 | -0.99938 |
| 16 | 0.811761 | -11.8024 | 41 | -0.99841 | -11.7693 |
| 17 | -7.97989 | 10.06323 | 42 | 19.66142 | -4.66047 |
| 18 | -0.99965 | -0.99987 | 43 | -0.26163 | -0.9912 |
| 19 | -0.99589 | -9.21374 | 44 | -0.99913 | 10.86458 |
| 20 | -0.99993 | -0.99939 | 45 | -0.99656 | -1.00026 |
| 21 | -0.99481 | 7.716018 | 46 | -0.99938 | -0.9954 |
| 22 | -0.99626 | -0.99942 | 47 | -0.93213 | 8.551675 |
| 23 | -1.00042 | -20.0751 | 48 | -0.96864 | 4.877284 |
| 24 | -1.00147 | -3.50135 | 49 | 2.603275 | -1.00131 |
| 25 | -0.78299 | -0.99811 | 50 | -0.96225 | -1.00061 |

Table 3 the range of relative error based on the double-turning-point whitenization weight function

| i-th interval grey number | range of relative error |
| --- | --- |
|
| 1 | 0.02%-0.40% |
| 2 | 0.03%-0.18% |
| 3 | 0.02%-0.71% |
| 4 | 0.03%-0.05% |
| 5 | 0.10%-0.77% |
| 6 | 0.23%-1.42% |
| 7 | 0.01%-0.32% |
| 8 | 0.38%-3.43% |
| 9 | 0.49%-2.99% |
| 10 | 0.06%-0.47% |
| 11 | 0.09%-1.97% |
| 12 | 0.05%-0.65% |
| 13 | 0.04%-1.04% |
| 14 | 0.06%-0.59% |

Table 4 the range of relative error based on the single-turning-point whitenization weight function

| i-th interval grey number | range of relative error |
| --- | --- |
|
| 1 | 0.02%-0.50% |
| 2 | 0.11%-0.39% |
| 3 | 0.15%-0.99% |
| 4 | 0.00%-0.15% |
| 5 | 0.29%-1.15% |
| 6 | 0.04%-2.65% |
| 7 | 0.15%-1.76% |
| 8 | 2.28%-5.42% |
| 9 | 2.41%-6.21% |
| 10 | 0.02%-0.91% |
| 11 | 1.18%-2.86% |
| 12 | 0.40%-1.12% |
| 13 | 0.96%-2.77% |
| 14 | 0.25%-1.23% |

Table 5 Comparison between algorithms in filling errors

| Miss rate | GKNN-CS | GKNN |
| --- | --- | --- |
| 5% | 20.75% | 24.01% |
| 10% | 26.31% | 29.44% |
| 15% | 30.27% | 31.98% |
| 20% | 33.88% | 36.52% |
| 25% | 39.64% | 43.95% |
| 30% | 42.50% | 50.76% |
| 35% | 43.99% | 52.33% |
| 40% | 47.42% | 56.65% |
| 45% | 49.81% | 59.51% |
| 50% | 52.13% | 64.87% |

Table 6 Comparison between algorithms in filling efficiency

| Miss rate | GKNN-CS | GKNN |
| --- | --- | --- |
| 5% | 100.00% | 65.58% |
| 10% | 100.00% | 62.44% |
| 15% | 100.00% | 58.98% |
| 20% | 98.70% | 54.52% |
| 25% | 96.50% | 50.95% |
| 30% | 96.18% | 50.95% |
| 35% | 88.23% | 42.33% |
| 40% | 82.97% | 40.65% |
| 45% | 77.42% | 39.51% |
| 50% | 62.11% | 34.87% |

Table 7 First group of experiment

| i-th Prediction | Primary samples | presamples |
| --- | --- | --- |
| 1 | 28.33% | 5.67% |
| 2 | 11.40% | 8.33% |
| 3 | -4.98% | 7.49% |
| 4 | 13.40% | 5.82% |
| 5 | 12.50% | 1.11% |
| 6 | 11.20% | -6.64% |
| 7 | 15.66% | 8.97% |
| 8 | 20.78% | -5.36% |
| 9 | -6.21% | 2.50% |
| 10 | 10.09% | -3.26% |
| 11 | 8.96% | 3.38% |
| 12 | -7.22% | 2.79% |
| 13 | -16.70% | 4.84% |
| 14 | -5.45% | 6.65% |
| 15 | 9.42% | 7.77% |
| 16 | 2.01% | 3.64% |
| 17 | 17.80% | 5.01% |
| 18 | 8.23% | -6.97% |
| 19 | 22.99% | -3.22% |
| 20 | 14.63% | 2.01% |

Table 8 Second group of experiment

| i-th Prediction | Primary samples | presamples |
| --- | --- | --- |
| 1 | 12.33% | -3.67% |
| 2 | 11.40% | 7.23% |
| 3 | -4.98% | 5.56% |
| 4 | 23.40% | 4.82% |
| 5 | 12.50% | 3.13% |
| 6 | 22.20% | -2.84% |
| 7 | 15.66% | 2.79% |
| 8 | 13.78% | -0.36% |
| 9 | 11.21% | 2.50% |
| 10 | 10.09% | 6.28% |
| 11 | 8.96% | 4.88% |
| 12 | 25.22% | 2.31% |
| 13 | -16.70% | -6.52% |
| 14 | -5.45% | -8.34% |
| 15 | 19.42% | 10.25% |
| 16 | 9.01% | 8.41% |
| 17 | 12.80% | 5.01% |
| 18 | -8.23% | -1.91% |
| 19 | -22.99% | -3.02% |
| 20 | 24.63% | 0.28% |

Table 9 Third group of experiment

| i-th Prediction | Primary samples | presamples |
| --- | --- | --- |
| 1 | 28.94% | 4.57% |
| 2 | -11.40% | 3.96% |
| 3 | 8.53% | 5.04% |
| 4 | 9.72% | -4.79% |
| 5 | -2.50% | 3.68% |
| 6 | 22.20% | 6.10% |
| 7 | 10.55% | -2.53% |
| 8 | 23.48% | 12.76% |
| 9 | 21.77% | 8.50% |
| 10 | 20.01% | 11.05% |
| 11 | 28.06% | 6.40% |
| 12 | 21.11% | 2.29% |
| 13 | -6.79% | 10.02% |
| 14 | -15.40% | 7.74% |
| 15 | 11.92% | 0.21% |
| 16 | 19.03% | -11.20% |
| 17 | -22.58% | -3.26% |
| 18 | -18.53% | 2.87% |
| 19 | -2.06% | -2.62% |
| 20 | 4.78% | 0.97% |

Table 10 Fourth group of experiment

| i-th Prediction | Primary samples | presamples |
| --- | --- | --- |
| 1 | 23.14% | 6.53% |
| 2 | 26.30% | 8.14% |
| 3 | -9.64% | 24.21% |
| 4 | 9.11% | 13.91% |
| 5 | 7.48% | 11.08% |
| 6 | 12.92% | 10.09% |
| 7 | 20.16% | 18.47% |
| 8 | 23.84% | 4.24% |
| 9 | 12.83% | 1.98% |
| 10 | -6.72% | 10.24% |
| 11 | 11.87% | 16.64% |
| 12 | 10.29% | 12.88% |
| 13 | 9.90% | 10.02% |
| 14 | 5.36% | 22.26% |
| 15 | 8.08% | 0.66% |
| 16 | 1.97% | 12.81% |
| 17 | 2.52% | -4.34% |
| 18 | -8.67% | 0.13% |
| 19 | -29.21% | -2.79% |
| 20 | -4.32% | 3.19% |

Table 11 Fifth group of experiment

| i-th Prediction | Primary samples | presamples |
| --- | --- | --- |
| 1 | 0.14% | 7.57% |
| 2 | 22.34% | 12.86% |
| 3 | 3.32% | 0.58% |
| 4 | 13.52% | 13.09% |
| 5 | 23.82% | 1.98% |
| 6 | 24.15% | 5.12% |
| 7 | 12.84% | 21.15% |
| 8 | 2.47% | 12.95% |
| 9 | 12.27% | 2.76% |
| 10 | 13.33% | 14.44% |
| 11 | 3.45% | 13.46% |
| 12 | 10.55% | 8.18% |
| 13 | 20.49% | 17.90% |
| 14 | 17.64% | 12.04% |
| 15 | -12.98% | -24.34% |
| 16 | 11.37% | 19.22% |
| 17 | 20.72% | -14.29% |
| 18 | -6.86% | -7.87% |
| 19 | -19.79% | 0.22% |
| 20 | 5.72% | 13.01% |
